# Supplementary material
Source: PubMed Central journal article supplement (PMC6612261)

# Gottimukkala et al., Figure S1

**A**

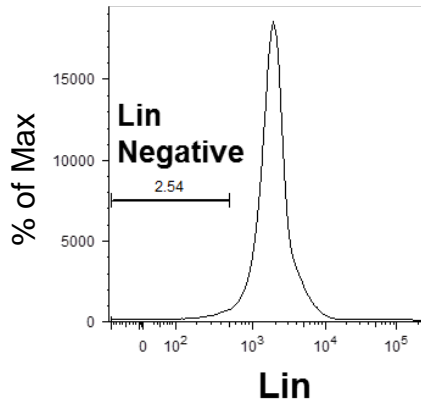

**B**

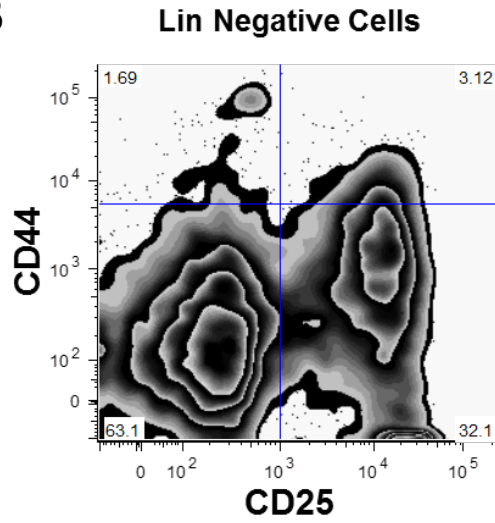

**C**

Total thymocytes

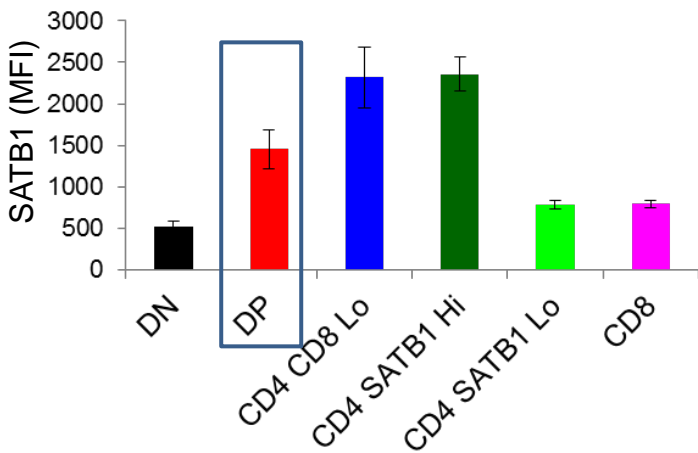

TCR-b<sup>Hi</sup> gated thymocytes

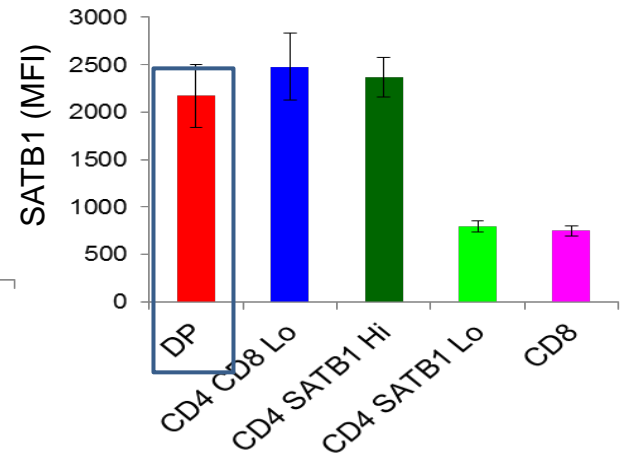

# Gottimukkala et al., Figure S2

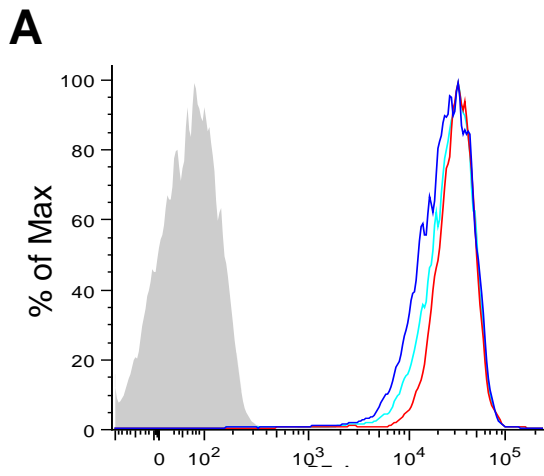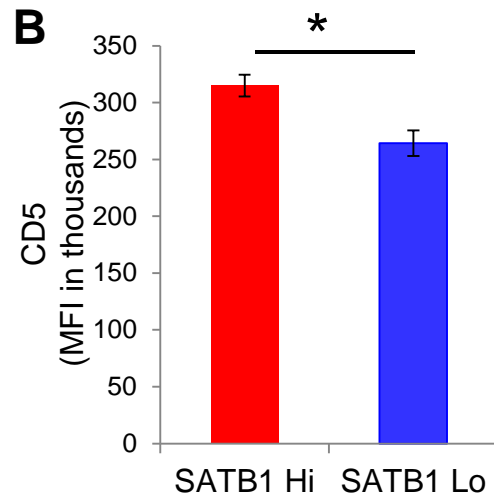

# Gottimukkala et al., Figure S3

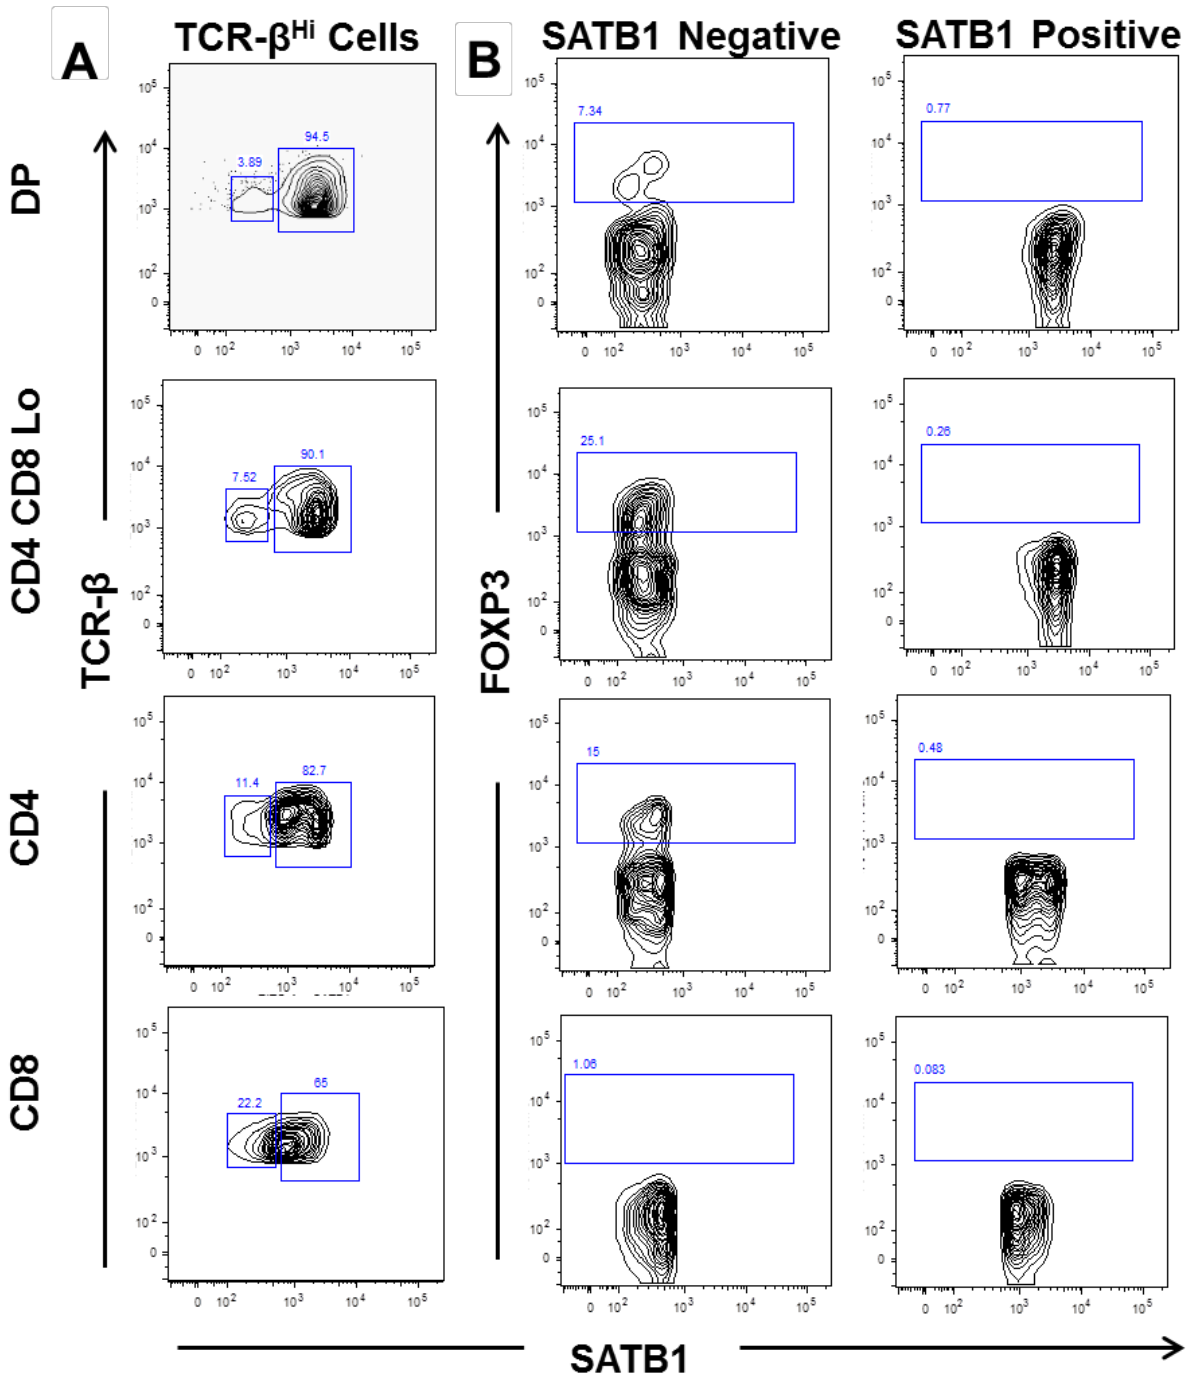

Supplement: NIHMS1019987-supplement-Supplementary_Material_1.pdf [file NIHMS1019987-supplement-Supplementary_Material_1.pdf]
